# Supplementary material for: Influences of CO 2 and Fungus-Assisted Bioweathering on Fluoridated Apatite
Source: Copernicus journal article supplement (doi:10.5194/egusphere-2025-5242), 2025-11-12
Supplement: Supplementary file [file egusphere-2025-5242-AC2-supplement.pdf]

## Response to Reviewer's Comments

All responses, corrections, and changes have been marked as **BLUE** color.

Overall, while the manuscript addresses an interesting topic on the combined effects of CO<sub>2</sub> and fungal bioweathering on fluoridated apatite, the study is not fit for publication. It requires quite substantial clarifications and strengthening in many aspects of the discussion – I have strong reservations on the main claim pushed by the authors. The introduction relies heavily on reviews rather than primary studies, this limits precision and depth in describing fungal weathering processes and CO<sub>2</sub> effects and leaves a feeling of being a bit swallow. Key mechanisms, such as fungal strategies, hyphal acidification, and microbial community alterations, apatite weathering kinetics need more precise and quantitative context. The methods section is sometimes opaque, lacking sufficient detail on experimental procedures, and analytical parameters. Several claims in the results and discussion are either not supported by the data presented or lack sufficient quantitative evidence, particularly regarding Ca/P alterations. As it stands, I am not supportive of publication in Biogeosciences.

1 – Reference list is too heavy on the reviews/synthesis, more or less 1/3 of the total reference falls in this category – and are repeatedly cited for many different processes (e.g., Rawat et al., 2021 – 4 times ; Hoffland et al., 4 times etc.) In my opinion, this indicates a lack of precision and shows superficiality in the introduction.

- 1) Rawat et al. (2021) is a representative and comprehensive review in the field of phosphate-solubilizing microorganisms, systematically summarizing the mechanisms of microbial phosphate solubilization from a mechanistic perspective. In contrast, Hoffland et al. (2004) is a landmark review on fungal involvement in mineral weathering, which, from an integrated ecological and geochemical perspective, clearly established that fungi actively regulate mineral dissolution and elemental release through both metabolic activity and physical interactions. These two studies therefore provide essential theoretical and conceptual frameworks that are highly relevant to multiple aspects of the present work.
- 2) Meanwhile, we have carefully re-evaluated the reference list and removed several non-essential citations to improve clarity and conciseness, while retaining only those references that are directly relevant to the objectives and interpretations of this study.

Lines 61 : There are different types of fungi. Bonneville et al. use ectomycorrhiza (fungi in symbiosis with tree roots), which is an important distinction to make here, as the demand for P is not the same as in saprophytic fungi.

Different fungi, even different microorganisms, may have physiological differences, but they also share the same characteristics. Mycorrhizal fungi and saprophytic fungi may have different requirements for phosphorus due to different driving forces, but they can both promote mineral weathering through similar physical and chemical mechanisms. We have updated this description. **Please refer to line 61-63 page 3.**

Lines 62 : What complementary process ?

The complementary process is the combination of biomechanical and biochemical actions. The former is rooted in the apical extension of the hyphae, and the latter is derived from acidolysis and complexolysis by the excreted low-molecular-weight organic compounds.

Lines 67 : The use of Filipelli et al. (2008) is not appropriate here as this work does not show direct apatite dissolution kinetics, especially in relation to pCO<sub>2</sub>. At least give some reference that measure apatite dissolution kinetic as a function of pH. There are plenty.

We have added the two below references. **Please refer to line 79 page 4.**

Chaïrat, C., Schott, J., Oelkers, E.H., Lartigue, J.E. and Harouiya, N. (2007) Kinetics and mechanism of natural fluorapatite dissolution at 25 °C and pH from 3 to 12. *Geochim Cosmochim Acta* 71, 5901-5912.

Harouiya, N., Chaïrat, C., Köhler, S.J., Gout, R. and Oelkers, E.H. (2007) The dissolution kinetics and apparent solubility of natural apatite in closed reactors at temperatures from 5 to 50 °C and pH from 1 to 6. *Chem Geol* 244, 554-568.

Lines 69 : The same issue with the use of Drever et al., 1994. Again a review – please cite some actual study that measured or calculated pCO<sub>2</sub> in rhizosphere or bulk soil instead of relying on reviews.

We have updated the reference.

A in-situ measurement result showed that rhizosphere pCO<sub>2</sub> can exceed atmospheric levels by one to two orders of magnitude (Gollany et al., 1993). **Please refer to line 81-83 page 4.**

Gollany, H.T., Schumacher, T.E., Rue, R.R. and Liu, S.Y. (1993) A carbon dioxide microelectrode for in situ pCO<sub>2</sub> measurement. *Microchemical Journal*, 42-49.

Lines 71 : The acidification near hyphae at the microscale was actually measured in Bonneville et al. 2011 and again Schmalenberger et al. 2015. Please cite primary studies.

We have updated the original description.

Lines 72 and 73 : In what ways CO<sub>2</sub> alters the structure of microbial communities ? The introduction is not very exhaustive with respect to primary studies (i.e., no reviews!) of fungal bioweathering. Some papers that could be cited include Rosling et al. (2007) in *Geobiology* or Smits et al. (2014 see below for references), which provide field evidence questioning the efficiency of fungal weathering of apatite. Including such studies would give the introduction more breadth, which currently feels quite shallow. For example, the manuscript discusses the effect of CO<sub>2</sub> on apatite weathering, but rates and kinetics—a quantitative aspect—are completely

left out. The introduction needs to be more precise and detailed; there are too many shortcomings at the moment for the manuscript to be acceptable for Biogeosciences.

The research on fungal weathering apatite has been updated, including the two papers (Rosling et al. 2007; Smits et al. 2014). **Please refer to line 70-76 page 4.**

The effects of CO<sub>2</sub> on microorganisms, including biomass, turnover rate and community changes were also rewritten. **Please refer to line 84-94 page 4-5.**

For clarification, CO<sub>2</sub> can alter the structure of microbial communities in many aspects, e.g., anaerobic and aerobic microorganisms

Rosling, A., Suttle, K.B., Johansson, E., Van Hees, P.A.W. and Banfield, J.F. (2007) Phosphorous availability influences the dissolution of apatite by soil fungi. *Geobiology* 5, 265-280.

Smits, M.M., Johansson, L. and Wallander, H. (2014) Soil fungi appear to have a retarding rather than a stimulating role on soil apatite weathering. *Plant Soil* 385, 217-228.

Line 104 : « Sterile water » ? OK, but what type of water ?? MilliQ ? Be precise

The sterile water refers to ultrapure water that has been sterilized again by high-pressure steam at 121 °C for 20 minutes. **Please refer to line 123 page 6.**

Line 103-106 : This protocol is quite opaque to readers who are not familiar with growing fungus. It should be rewritten more clearly.

We have rewritten this section to provide a more step-by-step description of spore collection, filtration, and quantification, explicitly stating the purpose of each step (e.g., removal of mycelial fragments and determination of spore concentration prior to inoculation).

After the surface of the culture medium was fully covered with black spores, the medium was drenched with sterile ultrapure water and the spores were carefully scraped from the plate surface with a fine artist's brush. The suspension was then filtered through a three-layer sterile cheesecloth to eliminate residual mycelial fragments. The concentration of spores was quantified using a hemocytometer under a light microscope before inoculation. **Please refer to line 121-126 page 6.**

Line 110 : Appetite ? This must be an error.

Corrected

Line 110-111 : Please provide the Miller indices of the apatite face exposed to weathering

The cross section of the apatite corresponds to the basal plane (001). The longitudinal section is parallel to the crystallographic c axis and therefore exposes prismatic faces. However, because the apatite specimens were not oriented single crystals, it is not possible to unambiguously assign a specific Miller index to the prismatic surface (e.g., {100} or {110}). Accordingly, the longitudinal surface is described as a prismatic face parallel to the c axis rather than a specific

crystallographic plane.

Line 131 : What is the P content of the PDA medium used in section 2.4 ? Are those Plimited conditions ?

The phosphorus content of potato dextrose agar (PDA) is not a fixed value, as phosphorus is derived primarily from the potato infusion rather than from added inorganic phosphate. Most of the phosphorus in PDA occurs in organic forms, with only trace amounts of inorganic phosphate. PDA is a standard basal medium for fungal cultivation and is generally not considered phosphorus-limited for fungal growth.

Line 150-151 : I wonder about the effect of applying sterile water at the end of each weathering experiment ? Why is this treatment applied? In my experience with fungal weathering experiments, fungi can fragment rock substrate into very fine particles that are likely lost during this treatment, not to mention the potential dissolution of those colloidal/nanoparticle. The addition of water and its subsequent drying can also be induce the precipitation of secondary phases indepedently of fungal colonization. Was any control trial performed on non-exposed apatite slices to see the effect ? Overall I think this is not a good idea and the potential effect of this treatment should be discussed.

- 1) The apatite slices were incubated in a vertical position in close contact with the PDA medium. At the end of the experiment, residual solid medium and loosely attached *Aspergillus niger* spores remained on the apatite surfaces, particularly at the contact interface. A gentle rinsing with sterile water was therefore applied to remove these residues and minimize interference with surface observations.
- 2) We acknowledge that this step may affect extremely fine weathering products; however, water-induced dissolution of fluorapatite is negligible due to its extremely low solubility ( $K_{sp} \approx 10^{-60}$ ), releasing only trace amounts of phosphate ( $<10^{-6} \text{ mol P L}^{-1}$ ) under neutral conditions. Thus, this treatment is unlikely to have altered the observed apatite surface features.
- 3) Regarding the possible precipitation of secondary phases during wetting and drying, the key observations that abundant calcium oxalate formation were spatially associated with fungal colonization and were not observed on apatite surfaces outside fungal contact zones, indicating a biogenic rather than abiotic origin.

Line 156-158 : For EDS analysis, the count rate ( $\text{counts} \cdot \text{s}^{-1}$ ) is important—please indicate this. .

During the EDS analysis, the count rate is  $900\text{-}1200 \text{ counts} \cdot \text{s}^{-1}$ , the acquisition (De Oliveira et al.) time is 60 s.

Line 166-169 : Concerning TEM-EDS measurements, what is the spot size of the beam, the step size along the profile, and the accelerating voltage used. What X-ray lines were analyzed and importantly the count s<sup>-1</sup>. There is a lack of explanation on how the Ca and P peak are quantitatively measured from EDS (e.g., background subtraction). There is some ambiguity as the measurement are said to be semi-quantitative and yet Fig. 3 presents quantification of Ca and P and of their ratio.

- 1) For the TEM-EDS analyses, the spot size of the beam was 2 nm and the accelerating voltage of 200 kV. Elemental quantification was based on the K-series characteristic X-ray lines of Ca (Ca K $\alpha$ ) and P (P K $\alpha$ ). The count rate during acquisition ranged from approximately 900 to 1200 counts s<sup>-1</sup>, ensuring an adequate signal-to-noise ratio while avoiding detector saturation.
- 2) Peak intensities were obtained from net peak counts following automatic background subtraction implemented in the EDS software. The analyses are described as semi-quantitative because no external standards were used and matrix effects were not fully corrected at the nanometer scale. Nevertheless, the relative variations in Ca and P intensities and the resulting Ca/P ratios shown in Fig. 3 reliably reflect compositional trends along the profiles rather than absolute concentrations. We have clarified this point in the revised text to avoid ambiguity.

In the revised manuscript, we have added a detailed description of the TEM-EDS analytical conditions and quantification procedure. **Please refer to line 187-192 page 9.**

Line 207-208 : How can those numbers be quantified if the TEM\_EDS is said to be semi-quantitative (see line 168).

The analyses are described as semi-quantitatively because no external standards were used and matrix effects were not fully corrected at the nanometer scale. Nevertheless, the relative variations in Ca and P intensities and the resulting Ca/P ratios shown in Fig. 3 reliably reflect compositional trends along the profiles rather than absolute concentrations. We have clarified this point in the revised text to avoid ambiguity.

Line 220 : « -9-9 nm » ? Must be a mistake.  
Corrected.

Line 238 : what is a « screw dislocation » ? This term must be defined.

A dislocation is a type of crystallographic line defect representing a one-dimensional imperfection in the crystal lattice, where the regular arrangement of atoms is locally disrupted. Dislocations are characterized by a Burgers vector that describes the magnitude and direction of lattice distortion. A screw dislocation is a specific type of dislocation in which atomic planes are displaced in a helical manner around the dislocation line, with the Burgers vector parallel to the dislocation line.

Such defects can locally increase surface energy and provide preferential pathways for crystal growth or dissolution.

This term had been defined. **Please refer to line 264-268 page 13.**

Line 243-244 : « *A. niger* induced more P depletion zones on the CFAP (Figs. 3a, c), suggesting that CFAP is more vulnerable to fungal weathering than LFAP. » This statement is not supported by the data shown in Figure 3. The data do not show a convincing Ca/P increase, synonymous of P depletion. At best, the topmost data point in CFAP show some P depletion but the rest of the Ca/P profile in CFAP (and LFAP) is within the bulk average meaning that there is no P alteration. The constant of Ca and P decrease at depth (in % atomic) are indicative of a thickness effect (i.e., the FIB foil is thinning out toward the top). In TEM-EDS, % atomic percent is not a concentration per unit volume, this is a normalized ratio of detected X-Ray intensities. Thickness variations affect the signals of elements differently. P (and O) emits lower energy Xrays than Ca, so its signal is absorbed more strongly as thickness increase. In addition, O (which contributes a large portion of the total signal) is strongly affected by thickness, which can bias normalized ratios. As a result, the relative percentages of Ca and P can change with depth even when their true concentrations do not. My advice : work with smaller depth profile – say 500 nm within FAP or even smaller to minimize thickness change effect and detect some feintier chemical alteration. Use STEM-EDS (instead of TEM-EDS) that focused beam down to a few nm and allow much finer characterization. After all, 45 days of alteration is not much, in order to gain time, you need to look small.

- 1) We thank the reviewer for the insightful comment and agree that thickness effects may bias TEM-EDS-derived normalized atomic percentages (especially for low-energy X-ray emitters like P and O) and that STEM-EDS-offering more accurate, spatially resolved compositional data-will be a valuable approach.
- 2) Nevertheless, the present data still provide evidence for localized P depletion at the hypha-mineral interface in the cross-sectional foil. In the CFAP sample, the uppermost data point within  $\sim 0.32 \mu\text{m}$  from the mineral surface consistently shows a decrease in P relative to Ca, whereas deeper portions of the profile converge toward the bulk Ca/P ratio. This observation suggests that the fungal influence on apatite chemistry is spatially restricted to a narrow near-surface zone.
- 3) For thickness effects, we note that the FIB foils used in this study have an overall thickness of approximately  $\sim 70 \text{ nm}$ , as confirmed by their high transparency under 4 kV accelerating voltage in the TEM. Within the top  $\sim 0.32 \mu\text{m}$  of the analyzed region, the foil thickness is effectively uniform, and no systematic thinning is observed in this near-surface interval. Therefore, the observed Ca/P variation in this zone cannot be readily attributed to thickness-related absorption effects and is more likely to reflect genuine near-surface chemical modification.

Line 255-257 : « The results that more calcium oxalate were formed near the mycelium on the CFAP than LFAP (Figs. 2c, d), further confirmed that the bioweathering of CFAP is stronger than that of LFAP » This claim is only vaguely supported by the data presented. In figure 2, there is only a small portion of the mycelium network shown (is that representative ?) Using a collection of SEM images, it would have been easy to count Ca-oxalate crystals on the two treatments and make a stronger case for that there is indeed a difference between two treatment.

- 1) We agree that the original statement was overstated based on the limited SEM field of view shown in Fig. 2. We have revised the text and weakened the claim.
- 2) Our interpretation was not based solely on the SEM images, but on a combined assessment of SEM-observed surface grooves and etching features together with AFM data showing more pronounced surface roughening on CFAP. Taken together, these observations suggest enhanced localized dissolution on CFAP.
- 3) We acknowledge that systematic counting of calcium oxalate crystals from a larger set of SEM images would provide stronger statistical support. While SEM allows reliable identification of micrometer-scale calcium oxalate crystals due to their characteristic morphologies, nanoscale calcium oxalate particles are difficult to fully resolve, meaning SEM-based counts would likely underestimate total calcium oxalate formation. To avoid overinterpretation, we have accordingly toned down the wording in the revised manuscript. **Please refer to line 290-292 page 14.**

Line 257- 263 : « *A. niger* can also accelerate the physical destruction of FAP through the biomechanical forces of mycelium growth. Fungal appressoria can produce osmotic pressures of up to 10–20  $\mu\text{N}/\mu\text{m}^2$  during hyphal growth, which would substantially accelerate the physical weathering (Hoffland et al., 2004; Howard et al. 1991). Screw dislocations in crystal cross-sections destabilize CFAP structure, enhancing its susceptibility to biomechanical destruction. Moreover, the released fluorine from FAP did not cause evident toxicity on the mineral surface. » Again, this whole paragraph is not supported by the data shown. Do the authors observe appressoria (those are recognizable structure)? To my knowledge, *Aspergillus niger* do not form appressoria. As for the biomechanical forcing, this could have been shown as in Bonneville et al., 2009 (<https://doi.org/10.1130/G25699A.1>) looking at crystal orientation by SAED using SAED (electron diffraction in TEM), but no such data presented.

- 1) We clarify that the *A. niger* strain used in this study does not form appressoria, and no appressorial structures were observed on the apatite surface. Accordingly, we did not intend to claim that *A. niger* generates osmotic pressures of 10-20  $\mu\text{N}/\mu\text{m}^2$  through appressoria in our system. The cited values (Howard et al., 1991; Hoffland et al., 2004) were introduced

only to illustrate one possible biomechanical pathway by which fungal growth can contribute to mineral weathering, rather than as direct evidence applicable to our observations.

- 2) Generally, biomechanical effects associated with fungal growth do not exclusively rely on appressoria. Because fungal hyphal growth is restricted to the tip (Riquelme, 2013), polarized tip extension can generate localized mechanical stresses and tensile forces at the hypha-substrate interface (Howard et al., 1991), which may contribute to physical disruption of mineral surfaces under certain conditions. In the present study, however, we acknowledge that direct evidence for such biomechanical forcing by *A. niger* on fluorapatite is limited.

- 3) We have updated this part. **Please refer to line 293-296 page 14.**

Riquelme M. (2013) Tip growth in filamentous fungi: A road trip to the apex. *Annual Review of Microbiology* 67, 587-609.

Lines 264 -294 : This section is not very convincing. OK there might be a rougher surface developping on apatite crystal due to soil and fungal respiration but this discussion lacks nuance. First, acidification near hypha due to respiration was shown before on a number of rock substrate (see Schmalenberger et al, 2015), then Smits et al. (2014) presented field evidence questioning the acceleration of apatite weathering by fungi, in fact this study showed a retarding effect of fungal colonization on apatite weathering under field conditions. This section is not very convincing. OK, there might be a rougher surface developing on apatite crystal due to soil and fungal respiration, but this discussion lacks nuance. First, acidification near hyphae due to respiration was shown before on a number of rock substrates (see Schmalenberger et al., 2015). Then Smits et al., 2014 presented field evidence questioning the acceleration of apatite weathering by fungi; in fact, this study showed a retarding effect of fungal colonization under field conditions likely due to complex interactions with soil chemistry, microbial communities, and organic matter. The manuscript would benefit from acknowledging these contrasting observations, discussing the limitations of laboratory-based microcosm experiments, and providing a more balanced interpretation of how fungal respiration and CO<sub>2</sub> may affect apatite weathering in both controlled and field-relevant contexts.

The increased surface roughness of apatite observed in this experiment is caused by high concentrations of CO<sub>2</sub> rather than by fungi (see Fig. 5).

We acknowledge the limitations of the laboratory microcosm experiment. The discrepancies between the laboratory results and field observations may arise from the complex interactions with soil chemical properties, microbial communities and organic matter. In particular, the microbial weathering on minerals in field usually points to overall influences by various microorganisms. This study aims to evaluate the weathering effects on different mineral faces by one typical phosphate--sulubilizing fungus. We have provided relevant comparisons and explanations in the Discussion section. **Please refer to line 334-342 page 16.**
